# Supplementary material for: microRNA-622 upregulates cell cycle process by targeting FOLR2 to promote CRC proliferation
Source: Springer Nature journal article supplement (doi:10.1186/s12885-023-11766-6), 2024-01-02
Supplement: MOESM1 [file 26582978]

## **Supplementary information**

### **Title page**

#### **Title**

microRNA-622 upregulates cell cycle process by targeting FOLR2 to promote CRC proliferation

#### **Authors**

Yuehong Chen†, Feng Liu†, Xinhua Chen†, Wenyi Li, Kejun Li, Hailang Cai, Shunyi Wang, Honglei Wang, Ke Xu, Chenxi Zhang, Shengzhi Ye, Yunhao Shen, Tingyu Mou, Shumin Cai\*, Jianwei Zhou\*, Jiang Yu\*.

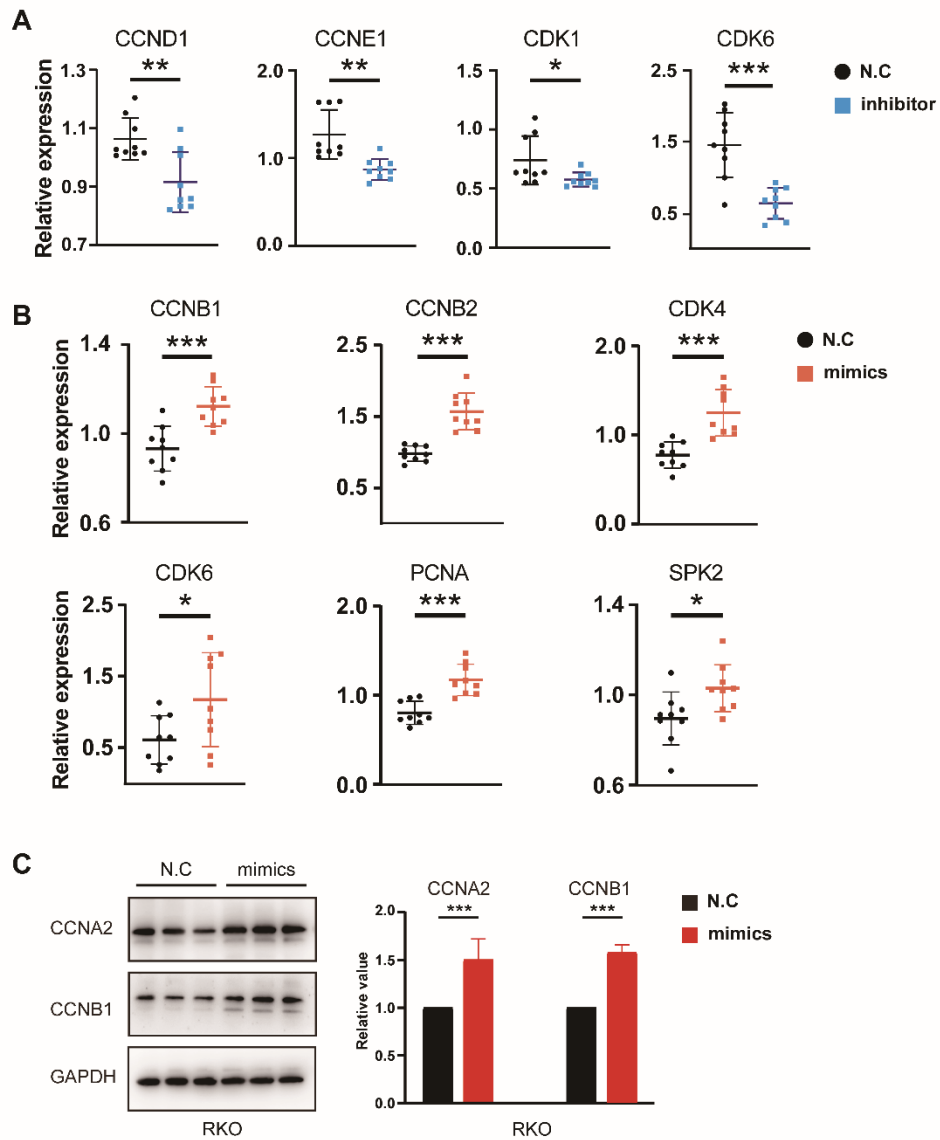

**Supplementary Figure 1. (A)** CCND1, CCNE1, CDK1 and CDK6 relative expression in miR-622 inhibitor/negative control vectors (N.C) transfected SW620. HPRT expression set as reference. \*  $P < 0.05$ , \*\*  $P < 0.01$ , \*\*\*  $P < 0.001$ ,  $t$  test. **(B)** CCNB1, CCNB2, CDK4, CDK6, PCNA and SPK2 relative expression in miR-622 mimics/negative control vectors (N.C) transfected RKO. HPRT expression set as reference. \*  $P < 0.05$ , \*\*  $P < 0.01$ , \*\*\*  $P < 0.001$ ,  $t$  test. All experiments were repeated for three times. **(C)** Immunoblots of CCNA2 and CCNB1 in miR-622 mimics/negative

control vectors (N.C) transfected RKO. GAPDH set as internal reference. Statistical analysis of immunoblot was calculated using imageJ and normalized to N.C group respectively. \*  $P < 0.05$ , \*\*  $P < 0.01$ , \*\*\*  $P < 0.001$ , *t* test.

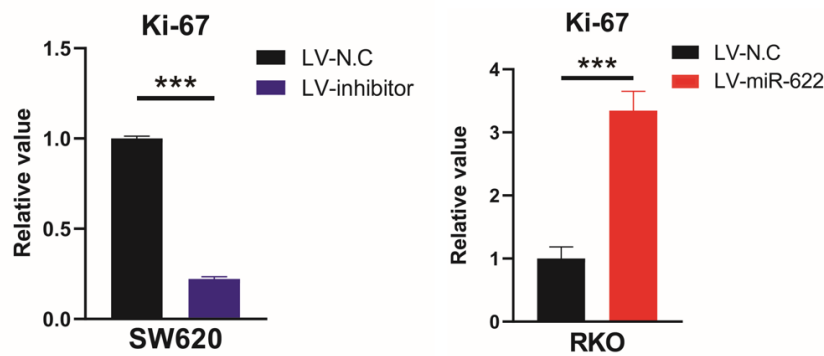

**Supplementary Figure 2.** Statistical analysis of immunoblot of Fig. 3D & 3E. Ki-67<sup>+</sup> cells were calculated using imageJ “cell counter” and normalized to N.C group. \*\*\*  $P < 0.001$ , *t* test. Repeated for three times.

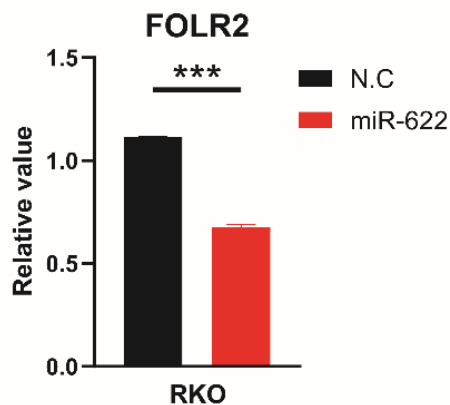

**Supplementary Figure 3.** Statistical analysis of immunoblot of Fig. 4I. Calculated using imageJ and normalized to GAPDH respectively. \*\*\*  $P < 0.001$ , *t* test. Repeated for three times.

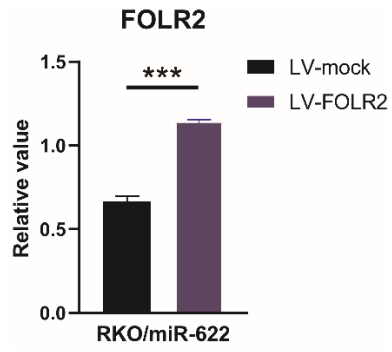

**Supplementary Figure 4.** Statistical analysis of immunoblot of Fig. 5A. Calculated using imageJ and normalized to GAPDH respectively. \*\*\*  $P < 0.001$ , t test. Repeated for three times.

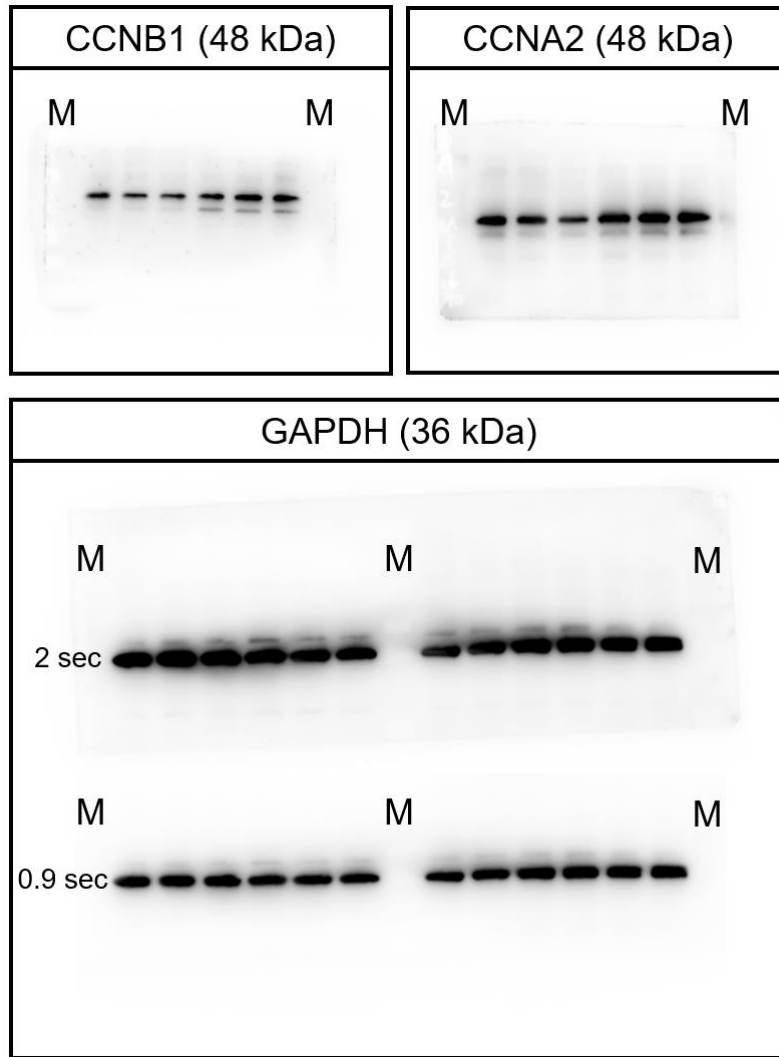

**Supplementary Figure 5.** Original blot of Supplementary Figure 1C (M, marker lane).

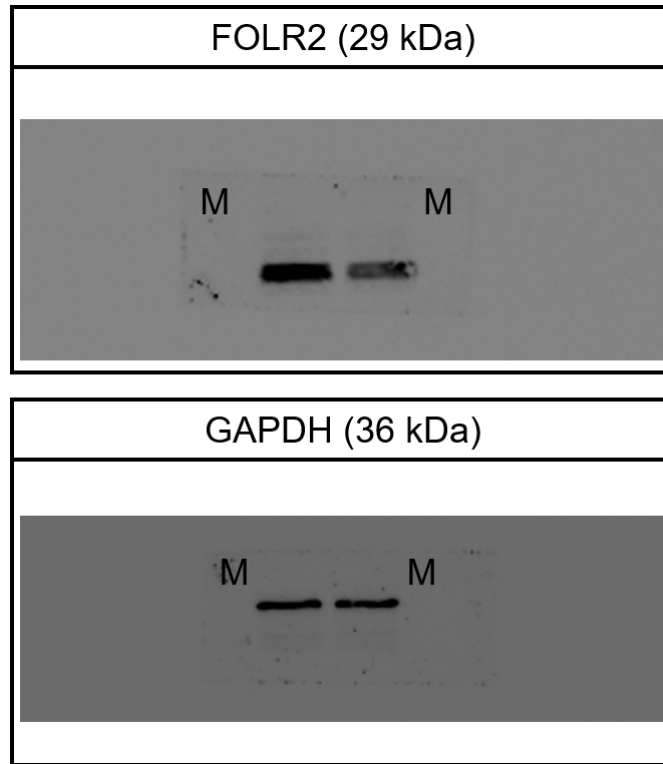

**Supplementary Figure 6.** Original blot of Figure 4I (M, marker lane).

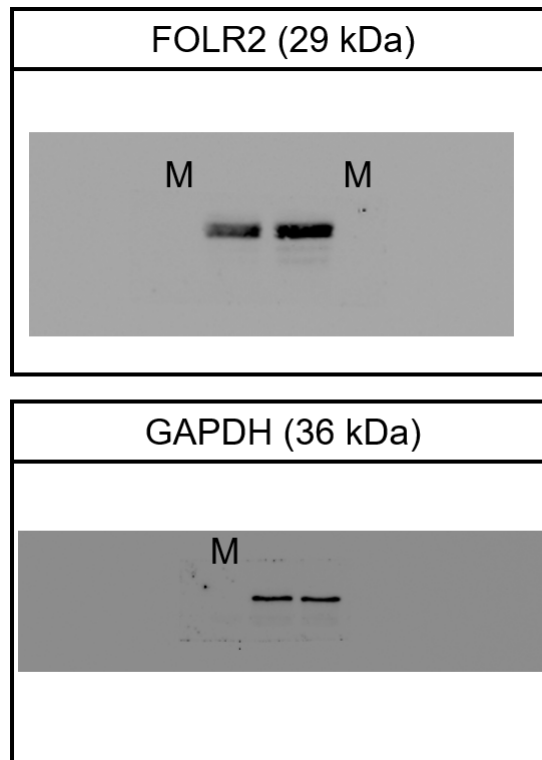

**Supplementary Figure 7.** Original blot of Figure 5A (M, marker lane).

## Supplementary Table 1.

Primers used in this manuscript

|       | Forward                 | Reverse                |
|-------|-------------------------|------------------------|
| CCNB1 | AATAAGGCGAAGATCAACATGGC | TTTGTTACCAATGTCCCAAGAG |
| CCNB2 | CCGACGGTGTCCAGTGATT     | TGTTGTTTTGGTGGGTTGAACT |
| CCND1 | GCTGCGAAGTGGAAACCATC    | CCTCCTTCTGCACACATTTGAA |
| CCNE1 | AAGGAGCGGGACACCATGA     | ACGGTCACGTTTGCCTTCC    |
| CDK1  | AAACTACAGGTCAAGTGGTAGCC | TCCTGCATAAGCACATCCTGA  |
| CDK4  | ATGGCTACCTCTCGATATGAGC  | CATTGGGGACTCTCACACTCT  |
| CDK6  | GCTGACCAGCAGTACGAATG    | GCACACATCAAACAACCTGACC |
| PCNA  | CCTGCTGGGATATTAGCTCCA   | CAGCGGTAGGTGTCGAAGC    |
| SKP2  | ATGCCCAATCTTGTCCATCT    | CACCGACTGAGTGATAGGTGT  |
